# Supplementary material
Source: ML conference proceedings conference paper supplement (https://proceedings.neurips.cc/paper_files/paper/2022/hash/323746f0ae2fbd8b6f500dc2d5c5f898-Abstract.html)
Supplement: Supplementary file 1 [file 323746f0ae2fbd8b6f500dc2d5c5f898-Supplemental-Conference.zip]

Archive with 13 entries (10 files):
- supplementary_material_camera_ready/
- supplementary_material_camera_ready/.ipynb_checkpoints/
- supplementary_material_camera_ready/.ipynb_checkpoints/Untitled-checkpoint.ipynb
- supplementary_material_camera_ready/appendix_deep_sub_lin.pdf
- supplementary_material_camera_ready/scaling_wider.pdf
- supplementary_material_camera_ready/optimization_labels.pdf
- supplementary_material_camera_ready/smallest-eigenvalue-NTK/
- supplementary_material_camera_ready/smallest-eigenvalue-NTK/README.md
- supplementary_material_camera_ready/smallest-eigenvalue-NTK/main_eigenvalue.py
- supplementary_material_camera_ready/smallest-eigenvalue-NTK/main_optimization.py
- supplementary_material_camera_ready/smallest-eigenvalue-NTK/plot.ipynb
- supplementary_material_camera_ready/smallest-eigenvalue-NTK/utils.py
- supplementary_material_camera_ready/README.md
