# Supplementary material
Source: ML conference proceedings conference paper supplement (https://proceedings.neurips.cc/paper_files/paper/2022/hash/323746f0ae2fbd8b6f500dc2d5c5f898-Abstract.html)
Supplement: Supplementary file 1 [file 323746f0ae2fbd8b6f500dc2d5c5f898-Supplemental-Conference.zip › supplementary_material_camera_ready/smallest-eigenvalue-NTK/plot.ipynb]

# %% [code]
import csv
import numpy as np
import pandas as pd
import seaborn as sns
import matplotlib.pyplot as plt
from matplotlib.colors import LogNorm

# %% [code]
data = []

for index in [str(i) for i in range(60)]:
    with open('./early_stopping_diag_cpu/optimization_' + index + '.txt', 'r') as f:
        reader = csv.reader(f,  delimiter='\t')
        for row in reader:
            new_row = []
            new_row.append(int(row[0]) ** 2)
            new_row.append(int(row[1]))
            new_row.append(np.log10(float(row[2])))
            data.append(new_row)

# %% [code]
for elem in data:
    elem[1] = elem[1] - elem[1] % 100
    elem[0] = elem[0] - elem[0] % 100

# %% [code]
df = pd.DataFrame(data=data, columns=(['d2', 'N', 'loss']))

# %% [code]
df = df.groupby(['d2', 'N']).mean().reset_index()

# %% [code]
dataframe = df.pivot('N', 'd2', 'loss')

# %% [code]
fig, ax = plt.subplots(1, 1, figsize=(3.6, 3))
ax = sns.heatmap(dataframe, cbar_kws={'label': r'$\log_{10}L(\theta_f)$'}, xticklabels=10, yticklabels=10)
ax.axes.invert_yaxis()
ax.set_xlabel(r'$d^2$')
ax.set_ylabel(r'$N$')

plt.show()
fig.savefig('optimization.pdf', bbox_inches='tight')

# %% [code]
np.random.rand()

# %% [code]


# %% [code]


# %% [code]


# %% [code]
data_eig = []

for index in [str(i) for i in range(10)]:
    with open('./min_eig_good/min_eig_good_' + index + '.txt', 'r') as f:
        reader = csv.reader(f,  delimiter='\t')
        for row in reader:
            new_row = []
            new_row.append(int(row[0]))
            new_row.append(int(row[1]))
            new_row.append(float(row[2]))
            data_eig.append(new_row)

# %% [code]
for elem in data_eig:
    elem[0] = elem[0] ** 2

# %% [code]
df_eig = pd.DataFrame(data=data_eig, columns=(['d', 'N', 'eig']))

# %% [code]
sns.set_theme(style="darkgrid")

fig_eig, ax_eig = plt.subplots(1, 1, figsize=(4.5, 3))
ax_eig = sns.lineplot(x='d', y='eig', hue='N', data=df_eig)
ax_eig.set_xlabel(r'$d^2$')
ax_eig.set_ylabel(r'$\lambda_{min}(K)$')
fig_eig.show()

fig_eig.savefig('scaling.pdf', bbox_inches='tight')

# %% [code]


# %% [code]
